# Supplementary material for: Evaluation of CTRL: a web application for dynamic consent and engagement with individuals involved in a cardiovascular genetic disorders cohort
Source: PubMed Central journal article supplement (PMC10772119; doi:10.1038/s41431-023-01454-1), 2023-09-14
Supplement: 41431_2023_1454_MOESM1_ESM.pdf [file 41431_2023_1454_MOESM1_ESM.pdf]

**Supplementary information for:**

Evaluation of CTRL: a web application for consent and engagement with individuals involved in a cardiovascular genetic disorders cohort

Matilda A. Haas, Evanthia O. Madelli, Rosie Brown, Megan Pictor and Tiffany Boughtwood

**Supplementary Table 1. Preferences for future (secondary) research use of samples and data and return of results.** Answers to questions in consent step 4 (preferences for the return of different types of incidental findings) and consent step 5 (permissions for different types of future research use of samples and data) are reported as number (n) and percentage (%). Pediatric, adult, prospective and retrospective groups, as well as the overall cohort choices are shown. The consent step questions and Stata analysis tables are also available to be reviewed in Supplementary information.

**Supplementary Figure 1. CTRL as part of the recruitment strategy.** Process of recruiting participants to register to CTRL. The top part of the figure refers to the prospective pathway and the bottom part to the retrospective pathway. In both pathways the CTRL flyer and the study database, REDCap, were used but the timing of invitation differed.

**Supplementary Figure 2. Research experience of CTRL and non-CTRL users.** A) Satisfaction with the study at baseline was 9.03 for the CTRL group (range 3-10, SD = 1.66) and 8.22 for the non-CTRL group (range 2-10, SD = 1.86) out of 10, respectively, and scores remained above 8 in follow up surveys for both cohorts. B) Decisional regret question high score indicates low decision regret (6-30 points). The mean score at baseline was 27.1 (SD = 3.1) for the CTRL group and 26.6 (SD = 3.0) for the non-CTRL group. Scores remained above 22.3 in follow up surveys for both groups. C) Trust in research(ers) questions resulted in a score between 4 and 20 points. The mean score at baseline was 15.2 (SD = 3.1) for the

CTRL group and 15.9 (SD = 3.2) for the non-CTRL group. D) Understanding of genomics questions were scored by the correct number of responses. For both the CTRL and non-CTRL groups at baseline was 8 (SD = 1 and SD = 2, respectively). All graphs report mean and standard deviation (SD), comparing CTRL (adult responses, prospective and retrospective combined) and non-CTRL groups.

**Page 4. CTRL flyer.** The flyer was included in paper-based consent forms used by study recruitment sites, and as an attachment to CTRL invitation emails sent to the retrospectively invited individuals.

**Page 5. CTRL consent step questions as they appear in the version of CTRL used by individuals in this study.**

**Page 9. Stata analysis tables for data presented in Table 1, Figures 2 and 3, Supplementary Table 1 and Supplementary Figure 2.**

**Page 38. Self-reported experience evaluation measures.** An additional question was included to capture the outcome of valuing the ability to change one's mind. The wording of the Trust scale was also amended, replacing 'patients' with 'participants'. Satisfaction was measured using an 11-point rating scale (0-10). Decision regret and trust in research(ers) were measured using a 5-point Likert-type scale which consisted of 6 and 4 items respectively. For decision regret, consistency was assessed by reversing the scoring of two of the six items that were negatively phrased. Higher score (6-30 points) indicated more confidence in decision (i.e. less decision regret). For the trust in research(ers) questions, the scoring of one of the four items was reversed. Higher score (4-20 points) indicated more trust. The understanding of genomic testing was measured using 10 items with the option to select 'True', 'False' or 'Unsure'. The number of correct responses was used to obtain a total score with a range between 0-10.

Supplementary Table 1. Preferences for future research use of samples and data and return of results

|                      |                         | Preferences for future research use of biological samples and data      |                                                                        |                                            |                                                    |                                        |                                     |                                                       |                                   |                                                                                                                                                                         |                                                                                                                                                      |                                                                                                                                                |                                                                                                                               |
|----------------------|-------------------------|-------------------------------------------------------------------------|------------------------------------------------------------------------|--------------------------------------------|----------------------------------------------------|----------------------------------------|-------------------------------------|-------------------------------------------------------|-----------------------------------|-------------------------------------------------------------------------------------------------------------------------------------------------------------------------|------------------------------------------------------------------------------------------------------------------------------------------------------|------------------------------------------------------------------------------------------------------------------------------------------------|-------------------------------------------------------------------------------------------------------------------------------|
|                      |                         | Not-for-profit organisations (eg Murdoch Children's Research Institute) | Universities and research institutes (eg The University of Queensland) | Government Australian Department of Health | Commercial companies (eg pharmaceutical companies) | General research use and clinical care | Health/medical/ biomedical research | Research must be specifically related to my condition | Population and ancestry research  | I agree to my general health information (eg just my MRIs, blood test or other results) being shared with other research studies that don't need my genomic information | I agree to my self-reported information (eg questionnaire responses) being shared with other research studies that don't need my genomic information | I want to be contacted every time my de-identified DNA sample, or self-reported genomic, health projects and clinical trials I am eligible for | I agree to Australian Genomics sharing my contact details with other research projects and clinical studies I am eligible for |
| <b>Prospective</b>   | <b>Paediatric n (%)</b> | Yes 5 (71.4)<br>Not sure 1 (14.3)<br>No 1 (14.3)                        | 5 (71.4)<br>1 (14.3)<br>1 (14.3)                                       | 4 (57.1)<br>2 (28.6)<br>1 (14.3)           | 3 (42.9)<br>2 (28.6)<br>1 (14.3)                   | 4 (57.1)<br>2 (28.6)<br>1 (14.3)       | 5 (71.4)<br>1 (14.3)<br>1 (14.3)    | 4 (57.1)<br>2 (28.6)<br>1 (14.3)                      | 3 (42.9)<br>3 (42.9)<br>1 (14.3)  | 4 (57.1)<br>2 (28.6)<br>1 (14.3)                                                                                                                                        | 6 (85.7)<br>2 (28.6)<br>1 (14.3)                                                                                                                     | 6 (85.7)<br>1 (14.3)<br>0                                                                                                                      | 7 (100)                                                                                                                       |
|                      | <b>Adult n (%)</b>      | Yes 23 (82.1)<br>Not sure 2 (7.1)<br>No 1 (3.6)                         | 24 (85.7)<br>3 (10.7)<br>1 (3.6)                                       | 20 (71.4)<br>5 (17.9)<br>3 (10.7)          | 12 (42.9)<br>6 (21.4)<br>10 (35.7)                 | 24 (85.7)<br>4 (14.3)<br>0             | 24 (85.7)<br>4 (14.3)<br>0          | 13 (46.4)<br>6 (21.4)<br>9 (32.1)                     | 18 (64.3)<br>5 (17.9)<br>3 (10.7) | 16 (57.1)<br>8 (28.6)<br>3 (10.7)                                                                                                                                       | 18 (64.3)<br>5 (17.9)<br>5 (17.9)                                                                                                                    | 18 (64.3)<br>5 (17.9)<br>5 (17.9)                                                                                                              | 23 (82.1)                                                                                                                     |
|                      | <b>Paediatric n (%)</b> | Yes 5 (83.3)<br>Not sure 1 (16.7)                                       | 5 (83.3)<br>1 (16.7)                                                   | 4 (66.7)<br>2 (33.3)                       | 2 (33.3)<br>3 (50.0)                               | 5 (83.3)<br>1 (16.7)                   | 5 (83.3)<br>1 (16.7)                | 3 (50.0)<br>2 (33.3)                                  | 5 (83.3)<br>1 (16.7)              | 3 (50.0)<br>3 (50.0)                                                                                                                                                    | 4 (66.7)<br>2 (33.3)                                                                                                                                 | 4 (66.7)<br>2 (33.3)                                                                                                                           | 5 (83.3)                                                                                                                      |
|                      | <b>Adult n (%)</b>      | Yes 40 (80.0)<br>Not sure 9 (18.0)<br>No 1 (2.0)                        | 41 (82.0)<br>9 (18.0)<br>0                                             | 36 (72.0)<br>12 (24.0)<br>2 (4.0)          | 24 (48.0)<br>19 (38.0)<br>7 (14.0)                 | 40 (80.0)<br>10 (20.0)<br>0            | 41 (82.0)<br>9 (18.0)<br>0          | 20 (40.0)<br>15 (30.0)<br>15 (30.0)                   | 36 (72.0)<br>11 (22.0)<br>3 (6.0) | 30 (60.0)<br>14 (28.0)<br>6 (12.0)                                                                                                                                      | 30 (60.0)<br>14 (28.0)<br>6 (12.0)                                                                                                                   | 30 (60.0)<br>12 (24.0)<br>8 (16.0)                                                                                                             | 30 (60.0)<br>12 (24.0)<br>13 (26.0)                                                                                           |
| <b>Retrospective</b> | <b>Paediatric n (%)</b> | Yes 73 (60.2)<br>Not sure 14 (15.4)<br>No 4 (4.4)                       | 75 (82.4)<br>14 (15.4)<br>2 (2.2)                                      | 64 (70.3)<br>21 (23.1)<br>6 (6.6)          | 41 (45.1)<br>30 (33.0)<br>20 (22.0)                | 73 (80.2)<br>17 (18.7)<br>1 (1.1)      | 75 (82.4)<br>15 (16.5)<br>1 (1.1)   | 40 (44.0)<br>25 (27.5)<br>26 (28.6)                   | 62 (68.1)<br>20 (22.0)<br>9 (9.9) | 54 (59.3)<br>27 (29.7)<br>10 (11.0)                                                                                                                                     | 53 (58.2)<br>28 (30.8)<br>10 (11.0)                                                                                                                  | 58 (63.7)<br>20 (22.0)<br>13 (14.3)                                                                                                            | 72 (79.1)                                                                                                                     |
|                      | <b>Paediatric n (%)</b> | Yes 43 (86.0)<br>Not sure 7 (14.0)                                      | 43 (86.0)<br>15 (30.0)                                                 | 43 (86.0)<br>6 (12.0)                      | 23 (46.0)<br>14 (28.0)                             | 43 (86.0)<br>6 (12.0)                  | 23 (46.0)<br>7 (14.0)               | 43 (86.0)<br>13 (26.0)                                | 43 (86.0)<br>7 (14.0)             | 43 (86.0)<br>14 (28.0)                                                                                                                                                  | 43 (86.0)<br>13 (26.0)                                                                                                                               | 43 (86.0)                                                                                                                                      |                                                                                                                               |
|                      | <b>Adult n (%)</b>      | Yes 77 (84.6)<br>Not sure 14 (15.4)                                     | 62 (68.1)<br>24 (26.4)                                                 | 77 (84.6)<br>12 (13.2)                     | 36 (39.6)<br>12 (13.2)                             | 79 (86.8)<br>12 (13.2)                 | 77 (84.6)<br>12 (13.2)              | 36 (39.6)<br>12 (13.2)                                | 79 (86.8)<br>12 (13.2)            | 77 (84.6)<br>28 (30.8)                                                                                                                                                  | 77 (84.6)<br>28 (30.8)                                                                                                                               | 77 (84.6)<br>12 (13.2)                                                                                                                         | 86 (86.8)                                                                                                                     |
|                      | <b>Combined n (%)</b>   | Yes 117 (84.6)<br>Not sure 23 (16.9)                                    | 117 (84.6)<br>38 (27.9)                                                | 117 (84.6)<br>22 (16.0)                    | 75 (54.7)<br>27 (19.7)                             | 117 (84.6)<br>22 (16.0)                | 117 (84.6)<br>22 (16.0)             | 75 (54.7)<br>27 (19.7)                                | 117 (84.6)<br>22 (16.0)           | 117 (84.6)<br>22 (16.0)                                                                                                                                                 | 117 (84.6)<br>22 (16.0)                                                                                                                              | 117 (84.6)<br>22 (16.0)                                                                                                                        | 130 (84.6)                                                                                                                    |

  

|                      |                         | Preferences for return of results (incidental findings)                                                             |                                                                                                                              |                                                                                                                                                               |                                                                                                                                                                                 |                                                                                                                                 |  |  |  |  |  |
|----------------------|-------------------------|---------------------------------------------------------------------------------------------------------------------|------------------------------------------------------------------------------------------------------------------------------|---------------------------------------------------------------------------------------------------------------------------------------------------------------|---------------------------------------------------------------------------------------------------------------------------------------------------------------------------------|---------------------------------------------------------------------------------------------------------------------------------|--|--|--|--|--|
|                      |                         | I want to know about the genetic change if it is medically actionable (can alter my health management or treatment) | I want to know about the genetic change if it is non-medically actionable (will not alter my health management or treatment) | I want to know if I am a carrier of a genetic change that can cause disease (it might affect decisions I make about having children, or for my grandchildren) | I'd like my medical team and the testing laboratory to decide whether I should be told actionable, non-medically actionable and carrier status findings on a case by case basis | I would like a summary of the main findings of my genomic testing report securely stored in CTR, so I can access it at any time |  |  |  |  |  |
| <b>Prospective</b>   | <b>Paediatric n (%)</b> | Yes 5 (71.4)<br>Not sure 2 (28.6)<br>No 0                                                                           | 4 (57.1)<br>3 (42.9)<br>0                                                                                                    | 5 (71.4)<br>2 (28.6)<br>0                                                                                                                                     | 2 (28.6)<br>3 (42.9)<br>2 (28.6)                                                                                                                                                | 5 (71.4)<br>2 (28.6)<br>0                                                                                                       |  |  |  |  |  |
|                      | <b>Adult n (%)</b>      | Yes 25 (89.3)<br>Not sure 3 (10.7)<br>No 0                                                                          | 20 (71.4)<br>4 (14.3)<br>4 (14.3)                                                                                            | 25 (89.3)<br>2 (7.1)<br>1 (3.6)                                                                                                                               | 9 (32.1)<br>9 (32.1)<br>10 (35.7)                                                                                                                                               | 26 (92.9)<br>2 (7.1)<br>0                                                                                                       |  |  |  |  |  |
|                      | <b>Paediatric n (%)</b> | Yes 4 (66.7)<br>Not sure 2 (33.3)<br>No 0                                                                           | 4 (66.7)<br>2 (33.3)<br>0                                                                                                    | 4 (66.7)<br>2 (33.3)<br>0                                                                                                                                     | 2 (33.3)<br>2 (33.3)<br>2 (33.3)                                                                                                                                                | 5 (83.3)<br>1 (16.7)<br>0                                                                                                       |  |  |  |  |  |
|                      | <b>Adult n (%)</b>      | Yes 43 (86.0)<br>Not sure 7 (14.0)<br>No 0                                                                          | 34 (68.0)<br>15 (30.0)<br>1 (2.0)                                                                                            | 43 (86.0)<br>6 (12.0)<br>1 (2.0)                                                                                                                              | 23 (46.0)<br>14 (28.0)<br>13 (26.0)                                                                                                                                             | 43 (86.0)<br>7 (14.0)<br>0                                                                                                      |  |  |  |  |  |
| <b>Retrospective</b> | <b>Paediatric n (%)</b> | Yes 77 (84.6)<br>Not sure 14 (15.4)                                                                                 | 62 (68.1)<br>24 (26.4)                                                                                                       | 77 (84.6)<br>12 (13.2)                                                                                                                                        | 36 (39.6)<br>12 (13.2)                                                                                                                                                          | 79 (86.8)<br>12 (13.2)                                                                                                          |  |  |  |  |  |
|                      | <b>Adult n (%)</b>      | Yes 117 (84.6)<br>Not sure 23 (16.9)                                                                                | 117 (84.6)<br>38 (27.9)                                                                                                      | 117 (84.6)<br>22 (16.0)                                                                                                                                       | 75 (54.7)<br>27 (19.7)                                                                                                                                                          | 117 (84.6)<br>22 (16.0)                                                                                                         |  |  |  |  |  |
|                      | <b>Paediatric n (%)</b> | Yes 43 (86.0)<br>Not sure 7 (14.0)                                                                                  | 43 (86.0)<br>15 (30.0)                                                                                                       | 43 (86.0)<br>6 (12.0)                                                                                                                                         | 23 (46.0)<br>14 (28.0)                                                                                                                                                          | 43 (86.0)<br>7 (14.0)                                                                                                           |  |  |  |  |  |
|                      | <b>Adult n (%)</b>      | Yes 77 (84.6)<br>Not sure 14 (15.4)                                                                                 | 62 (68.1)<br>24 (26.4)                                                                                                       | 77 (84.6)<br>12 (13.2)                                                                                                                                        | 36 (39.6)<br>12 (13.2)                                                                                                                                                          | 79 (86.8)<br>12 (13.2)                                                                                                          |  |  |  |  |  |

# Supplementary Figure 1. CTRL as part of the recruitment strategy

Cardiovascular Genetic Disorders Flagship

PROSPECTIVE

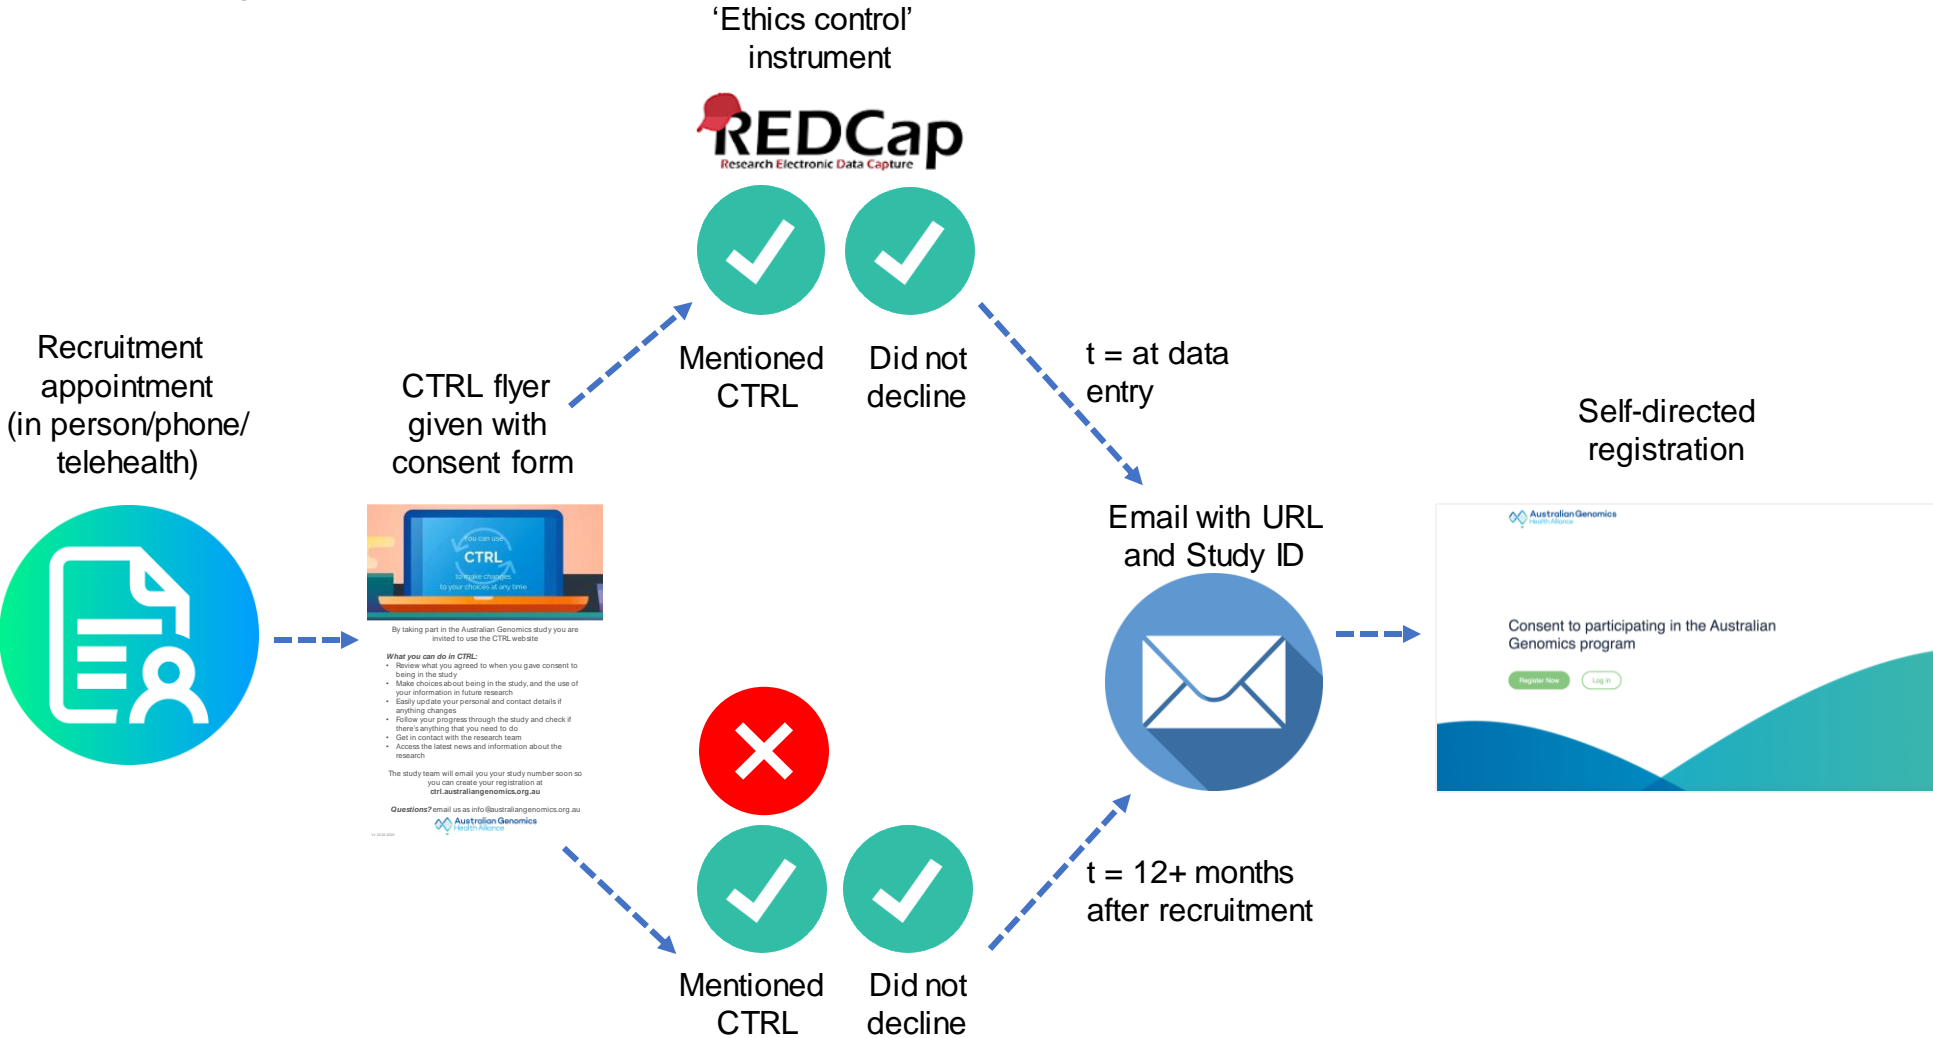

RETROSPECTIVE

**A** Supplementary Figure 2. Research experience of CTRL and non-CTRL users

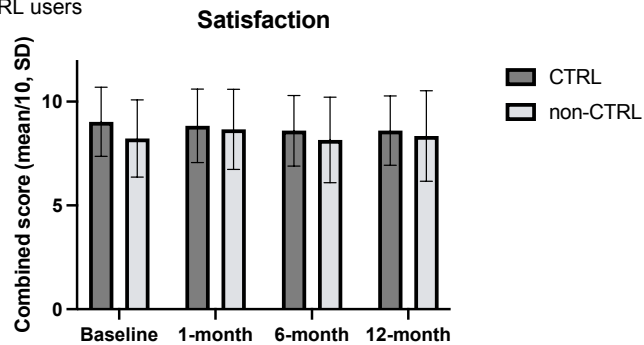

**B**

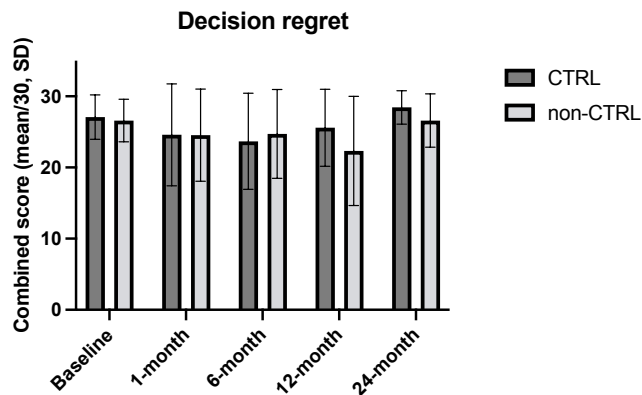

**C**

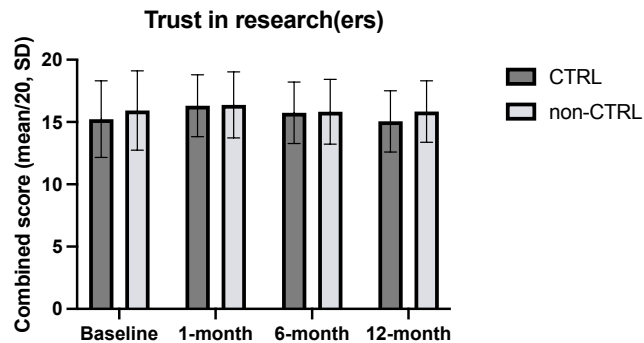

**D**

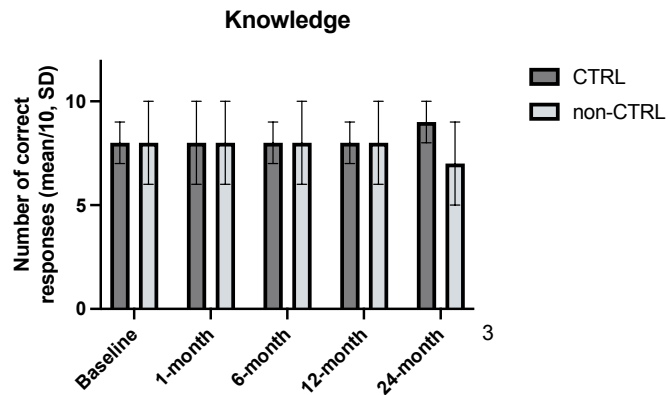



You can use  
**CTRL**  
to make changes  
to your choices at any time

By taking part in the Australian Genomics study you are invited to use the CTRL website

***What you can do in CTRL:***

- Review what you agreed to when you gave consent to being in the study
- Make choices about being in the study, and the use of your information in future research
- Easily update your personal and contact details if anything changes
- Follow your progress through the study and check if there's anything that you need to do
- Get in contact with the research team
- Access the latest news and information about the research

The study team will email you your study number soon so you can create your registration at **[ctrl.australiangenomics.org.au](http://ctrl.australiangenomics.org.au)**

**Questions?** email us as [info@australiangenomics.org.au](mailto:info@australiangenomics.org.au)

|                                                                                                                                                                                                                                     | Options            | Type of choice                               |
|-------------------------------------------------------------------------------------------------------------------------------------------------------------------------------------------------------------------------------------|--------------------|----------------------------------------------|
| <b>Step 1. Information</b>                                                                                                                                                                                                          |                    |                                              |
| Watch our short video about the consent process for taking part in medical research, and how you can use this website during the study.                                                                                             |                    |                                              |
| <b>Step 2. Consent to the genomic test</b>                                                                                                                                                                                          |                    |                                              |
| I understand I am providing a sample so that my DNA can be extracted and all of my genes could be looked at. This is called a genomic test.                                                                                         | Checkbox agreement | Must agree with the statement to participate |
| I understand have a genomic test may not find the genetic cause of my condition.                                                                                                                                                    | Checkbox agreement | Must agree with the statement to participate |
| I understand my sample and genomic information will be stored by the testing laboratory so that it could be looked at again in the future, when we know more about genes that cause my health condition.                            | Checkbox agreement | Must agree with the statement to participate |
| I understand my genomic test results are confidential and will only be shared with the medical team directly involved in my care.                                                                                                   | Checkbox agreement | Must agree with the statement to participate |
| I understand that the testing laboratory could share my anonymous genomic information with other laboratories, in order to understand more about the genetic changes that can cause my health condition or other conditions.        | Checkbox agreement | Must agree with the statement to participate |
| I understand the laboratory performing my test will store and may sometimes use my DNA sample for purposes like references and control material.                                                                                    | Checkbox agreement | Must agree with the statement to participate |
| I understand there are certain risks involved in having a genomic test. These could include finding out something that may be important for my family's health, incidental findings, or having to disclose the genomic information. | Checkbox agreement | Must agree with the statement to participate |
| I understand that if I am taking out a new policy for life, critical illness or income protection insurance, the insurer may ask me to disclose that I have had a genetic test and require me to provide my results.                | Checkbox agreement | Must agree with the statement to participate |
| I understand my employer, or future employers, may ask for my results to decide whether there is a risk associated with a particular job role.                                                                                      | Checkbox agreement | Must agree with the statement to participate |
| I understand that it might be important to tell my family members about genetic changes that could directly affect their health. My medical team will support me in sharing such information with my family.                        | Checkbox agreement | Must agree with the statement to participate |

|                                                                                                                                                                                                    |                       |                                                           |
|----------------------------------------------------------------------------------------------------------------------------------------------------------------------------------------------------|-----------------------|-----------------------------------------------------------|
| I understand all of the information above and the choices I have made. (leaving this box unchecked means you will be contacted by a Genetic Counsellor who will give you more information)         | Checkbox              | May be left unchecked                                     |
| <b>Step 3. Consent to research participation</b>                                                                                                                                                   |                       |                                                           |
| I understand that the researchers will collect information from my medical records.                                                                                                                | Checkbox agreement    | Must agree with the statement to participate              |
| I understand that at times during the research project I will be asked to complete surveys or questionnaires. I'll be reminded when they are ready to complete and I can ask for help to do them.  | Checkbox agreement    | Must agree with the statement to participate              |
| I understand that my samples and data may be used in further research when no cause is found as part of the initial test and/or when further investigation is required to understand my condition. | Checkbox agreement    | Must agree with the statement to participate              |
| I understand all of the information about and the choices I have made. (leaving this box unchecked means you will be contacted by a Genetic Counsellor who will give you more information)         | Checkbox              | May be left unchecked                                     |
| <b>Step 4. Preferences about your results</b>                                                                                                                                                      |                       |                                                           |
| I want to know about the genetic change if it is medically actionable (can alter my health management or treatment).                                                                               | Yes<br>No<br>Not sure | Optional and can change over time                         |
| I want to know about the genetic change if it is non-medically actionable (will not alter my health management or treatment).                                                                      | Yes<br>No<br>Not sure | Optional and can change over time                         |
| I want to know if I am a carrier of a genetic change that can cause disease (it might affect decisions I make about having children, or for my grandchildren).                                     | Yes<br>No<br>Not sure | Optional and can change over time                         |
| I'd like my medical team and the testing laboratory to decide whether I should be told about medically actionable, non-medically actionable and carrier status findings on a case by case basis.   | Checkbox              | Optional and can change over time / may be left unchecked |
| I would like a summary of the main findings of my genomic testing report securely stored in CTRL, so I can access it at any time.                                                                  | Checkbox              | Optional and can change over time / may be left unchecked |



|                                                                                                                                                                                            |                       |                                   |
|--------------------------------------------------------------------------------------------------------------------------------------------------------------------------------------------|-----------------------|-----------------------------------|
| I understand all of the information about and the choices I have made. (leaving this box unchecked means you will be contacted by a Genetic Counsellor who will give you more information) | Checkbox              | May be left unchecked             |
| <b>Step 5. Consent to research outside this study</b>                                                                                                                                      |                       |                                   |
| Who can have access to my de-identified samples and information?                                                                                                                           |                       |                                   |
| Not-for-profit research organisations (eg Murdoch Children's Research Institute)                                                                                                           | Yes<br>No<br>Not sure | Optional and can change over time |
| Universities and research institutes (eg The University of Queensland)                                                                                                                     | Yes<br>No<br>Not sure | Optional and can change over time |
| Government (eg Australian Government Department of Health)                                                                                                                                 | Yes<br>No<br>Not sure | Optional and can change over time |
| Commercial companies (eg pharmaceutical companies)                                                                                                                                         | Yes<br>No<br>Not sure | Optional and can change over time |
| What kinds of research can they do with my de-identified samples and information?                                                                                                          |                       |                                   |
| General research use and clinical care                                                                                                                                                     | Yes<br>No<br>Not sure | Optional and can change over time |
| Health/medical/biomedical research                                                                                                                                                         | Yes<br>No<br>Not sure | Optional and can change over time |
| Research must be specifically related to my condition.                                                                                                                                     | Yes<br>No<br>Not sure | Optional and can change over time |

|                                                                                                                                                                           |                       |                                                           |
|---------------------------------------------------------------------------------------------------------------------------------------------------------------------------|-----------------------|-----------------------------------------------------------|
| Population and ancestry research                                                                                                                                          | Yes<br>No<br>Not sure | Optional and can change over time                         |
| I agree to my general health information (eg just my MRIs, blood test or other results) being shared with other research studies that don't need my genetic information.  | Checkbox              | Optional and can change over time / may be left unchecked |
| I agree to my self-reported information (eg questionnaire responses) being shared with other research studies that don't need my genomic information.                     | Checkbox              | Optional and can change over time / may be left unchecked |
| I want to be contacted every time my de-identified DNA sample, genomic, health or self-reported information is shared.                                                    | Checkbox              | Optional and can change over time / may be left unchecked |
| I agree to Australian Genomics sharing my contact details with other research projects and clinical trials doing studies I am eligible for.                               | Checkbox              | Optional and can change over time / may be left unchecked |
| I understand all of the information above and the choices I have made. (unchecked means you will be contacted by a Genetic Counsellor who will give you more information) | Checkbox              | May be left unchecked                                     |

# Data analysis in Stata IC 17.0

## 1. Cohort characteristics (age)

### a. Prospective cohort

```
. summarize age_prospective, detail
```

| Age (Prospective) |          |         |             |           |
|-------------------|----------|---------|-------------|-----------|
| Percentiles       | Smallest |         |             |           |
| 1%                | 0        | 0       |             |           |
| 5%                | 0        | 0       |             |           |
| 10%               | 7        | 3       | Obs         | 35        |
| 25%               | 23       | 7       | Sum of wgt. | 35        |
| 50%               | 43       |         | Mean        | 37.11429  |
|                   |          | Largest | Std. dev.   | 19.96581  |
| 75%               | 54       | 59      |             |           |
| 90%               | 59       | 63      | Variance    | 398.6336  |
| 95%               | 66       | 66      | Skewness    | -.4387814 |
| 99%               | 69       | 69      | Kurtosis    | 2.125167  |

```
. tabulate age_prospective_gr
```

| Age<br>(grouped)<br>(Prospective) | Freq. | Percent | Cum.   |
|-----------------------------------|-------|---------|--------|
| 0-25                              | 9     | 25.71   | 25.71  |
| 26-50                             | 15    | 42.86   | 68.57  |
| >50                               | 11    | 31.43   | 100.00 |
| Total                             | 35    | 100.00  |        |

### b. Retrospective cohort

```
. summarize age_retrospective, detail
```

| Age (Retrospective) |          |         |             |           |
|---------------------|----------|---------|-------------|-----------|
| Percentiles         | Smallest |         |             |           |
| 1%                  | 0        | 0       |             |           |
| 5%                  | 1        | 0       |             |           |
| 10%                 | 13       | 1       | Obs         | 56        |
| 25%                 | 26       | 3       | Sum of wgt. | 56        |
| 50%                 | 42       |         | Mean        | 39.39286  |
|                     |          | Largest | Std. dev.   | 17.90447  |
| 75%                 | 51       | 63      |             |           |
| 90%                 | 60       | 64      | Variance    | 320.5701  |
| 95%                 | 64       | 67      | Skewness    | -.5787178 |
| 99%                 | 72       | 72      | Kurtosis    | 2.712761  |

```
. tabulate age_retrospective_gr
```

| Age<br>(grouped)<br>(Retrospective) | Freq. | Percent | Cum.   |
|-------------------------------------|-------|---------|--------|
| 0-25                                | 14    | 25.00   | 25.00  |
| 26-50                               | 27    | 48.21   | 73.21  |
| >50                                 | 15    | 26.79   | 100.00 |
| Total                               | 56    | 100.00  |        |

### c. Non-CTRL cohort

. summarize age\_nonCTRL, detail

| Age (non-CTRL) |          |         |             |           |
|----------------|----------|---------|-------------|-----------|
| Percentiles    | Smallest |         |             |           |
| 1%             | 0        | 0       |             |           |
| 5%             | 0        | 0       |             |           |
| 10%            | 5        | 0       | Obs         | 444       |
| 25%            | 24.5     | 0       | Sum of wgt. | 444       |
| 50%            | 40       |         | Mean        | 37.53153  |
|                |          | Largest | Std. dev.   | 19.98795  |
| 75%            | 52       | 77      |             |           |
| 90%            | 63       | 78      | Variance    | 399.5182  |
| 95%            | 68       | 81      | Skewness    | -.2682072 |
| 99%            | 75       | 82      | Kurtosis    | 2.31126   |

. tabulate age\_nonCTRL\_gr

| Age<br>(grouped)<br>(non-CTRL) | Freq. | Percent | Cum.   |
|--------------------------------|-------|---------|--------|
| 0-25                           | 115   | 25.90   | 25.90  |
| 26-50                          | 206   | 46.40   | 72.30  |
| >50                            | 123   | 27.70   | 100.00 |
| Total                          | 444   | 100.00  |        |

### d. Active decliner cohort

. summarize age\_decl, detail

| age_decl    |          |         |             |          |
|-------------|----------|---------|-------------|----------|
| Percentiles | Smallest |         |             |          |
| 1%          | 0        | 0       |             |          |
| 5%          | 0        | 0       |             |          |
| 10%         | 0        | 0       | Obs         | 66       |
| 25%         | 22       | 0       | Sum of wgt. | 66       |
| 50%         | 38       |         | Mean        | 35.18182 |
|             |          | Largest | Std. dev.   | 19.46667 |
| 75%         | 49       | 65      |             |          |
| 90%         | 60       | 68      | Variance    | 378.951  |
| 95%         | 65       | 72      | Skewness    | -.317371 |
| 99%         | 72       | 72      | Kurtosis    | 2.449304 |

. tabulate age\_decl\_gr

| Age<br>(grouped)<br>(decliners) | Freq. | Percent | Cum.   |
|---------------------------------|-------|---------|--------|
| 0-25                            | 17    | 25.76   | 25.76  |
| 26-50                           | 36    | 54.55   | 80.30  |
| >50                             | 13    | 19.70   | 100.00 |
| Total                           | 66    | 100.00  |        |

**e. Chi-square test for individual ages in the prospective and retrospective cohorts**

`. csgof age_prospective_gr, expperc(26 50 24)`

| age_pr~r | expperc | expfreq | obsfreq |
|----------|---------|---------|---------|
| 0-25     | 26      | 9.1     | 9       |
| 26-50    | 50      | 17.5    | 15      |
| >50      | 24      | 8.4     | 11      |

chisq(2) is 1.16, p = .5591

`. csgof age_retrospective_gr, expperc(26 46 28)`

| age_re~r | expperc | expfreq | obsfreq |
|----------|---------|---------|---------|
| 0-25     | 26      | 14.56   | 14      |
| 26-50    | 46      | 25.76   | 27      |
| >50      | 28      | 15.68   | 15      |

chisq(2) is .11, p = .9461

**f. Chi-square test for individual gender in the prospective and retrospective cohorts**

`. csgof gender_prospective, expperc(46,54)`

| gender~e | expperc | expfreq | obsfreq |
|----------|---------|---------|---------|
| Male     | 46      | 16.1    | 17      |
| Female   | 54      | 18.9    | 18      |

chisq(1) is .09, p = .7602

`. csgof gender_retrospective, expperc(55,45)`

| gender~e | expperc | expfreq | obsfreq |
|----------|---------|---------|---------|
| Male     | 55      | 30.8    | 39      |
| Female   | 45      | 25.2    | 17      |

chisq(1) is 4.85, p = .0276

**g. Chi-square test for individual education level in the prospective and retrospective cohorts**

```
. csgof edu_prospective_gr, expperc(70 30)
```

| edu_prospective_gr  | expperc | expfreq | obsfreq |
|---------------------|---------|---------|---------|
| Higher education    | 70      | 22.4    | 24      |
| No higher education | 30      | 9.6     | 8       |

chisq(1) is .38, p = .5371

```
. csgof edu_retrospective_gr, expperc(72 28)
```

| edu_retrospective~r | expperc | expfreq | obsfreq |
|---------------------|---------|---------|---------|
| Higher education    | 72      | 33.84   | 37      |
| No higher education | 28      | 13.16   | 10      |

chisq(1) is 1.05, p = .3046

**h. Chi-square test to compare individual education level between those who registered to CTRL and those who didn't**

```
. tabulate edu_cohort edu_reg_nonCTRL_gr, chi2
```

| Cohort     | Education<br>(Reg/nonCTRL) |           | Total |
|------------|----------------------------|-----------|-------|
|            | Higher                     | No higher |       |
| Registered | 61                         | 18        | 79    |
| nonCTRL    | 200                        | 87        | 287   |
| Total      | 261                        | 105       | 366   |

Pearson chi2(1) = 1.7164 Pr = 0.190

**i. Chi-square test on genetic diagnosis in the retrospective cohort**

```
. csgof dx_retrospective,expperc redacted
```

| dx_retrospective                | expperc  | expfreq | obsfreq |
|---------------------------------|----------|---------|---------|
| Postitive diagnosis             | redacted | 19.04   | 24      |
| Negative or uncertain diagnosis | redacted | 36.96   | 32      |

chisq(1) is 1.96, p = .1618

## 2. Preferences for return of results

### a. Prospective adult group

```
. table res_ret_actionable_adult, statistic(frequency) statistic(percent) nformat(%2.1f)
```

|                                                                       | Frequency | Percent |
|-----------------------------------------------------------------------|-----------|---------|
| I want to know about the genetic change if it is medically actionable |           |         |
| Yes                                                                   | 25.0      | 89.3    |
| Not sure                                                              | 3.0       | 10.7    |
| Total                                                                 | 28.0      | 100.0   |

```
. table res_ret_nonactionable_adult, statistic(frequency) statistic(percent) nformat(%2.1f)
```

|                                                                           | Frequency | Percent |
|---------------------------------------------------------------------------|-----------|---------|
| I want to know about the genetic change if it is non-medically actionable |           |         |
| No                                                                        | 4.0       | 14.3    |
| Yes                                                                       | 20.0      | 71.4    |
| Not sure                                                                  | 4.0       | 14.3    |
| Total                                                                     | 28.0      | 100.0   |

```
. table res_ret_carrier_adult, statistic(frequency) statistic(percent) nformat(%2.1f)
```

|                                                                             | Frequency | Percent |
|-----------------------------------------------------------------------------|-----------|---------|
| I want to know if I am a carrier of a genetic change that can cause disease |           |         |
| No                                                                          | 1.0       | 3.6     |
| Yes                                                                         | 25.0      | 89.3    |
| Not sure                                                                    | 2.0       | 7.1     |
| Total                                                                       | 28.0      | 100.0   |

```
. table res_ret_team_decision_adult, statistic(frequency) statistic(percent) nformat(%2.1f)
```

|                                                               | Frequency | Percent |
|---------------------------------------------------------------|-----------|---------|
| I'd like my medical team and the testing laboratory to decide |           |         |
| No                                                            | 10.0      | 35.7    |
| Yes                                                           | 9.0       | 32.1    |
| Not sure                                                      | 9.0       | 32.1    |
| Total                                                         | 28.0      | 100.0   |

```
. table res_ret_summary_upload_adult, statistic(frequency) statistic(percent) nformat(%2.1f)
```

|                                                                     | Frequency | Percent |
|---------------------------------------------------------------------|-----------|---------|
| I would like a summary of the main findings securely stored in CTRL |           |         |
| Yes                                                                 | 26.0      | 92.9    |
| Not sure                                                            | 2.0       | 7.1     |
| Total                                                               | 28.0      | 100.0   |

## b. Prospective paediatric (parent/guardian) group

. table res\_ret\_actionable\_paed, statistic(frequency) statistic(percent) nformat(%2.1f)

|                                                                       | Frequency | Percent |
|-----------------------------------------------------------------------|-----------|---------|
| I want to know about the genetic change if it is medically actionable |           |         |
| Yes                                                                   | 5.0       | 71.4    |
| Not sure                                                              | 2.0       | 28.6    |
| Total                                                                 | 7.0       | 100.0   |

. table res\_ret\_nonactionable\_paed, statistic(frequency) statistic(percent) nformat(%2.1f)

|                                                                           | Frequency | Percent |
|---------------------------------------------------------------------------|-----------|---------|
| I want to know about the genetic change if it is non-medically actionable |           |         |
| Yes                                                                       | 4.0       | 57.1    |
| Not sure                                                                  | 3.0       | 42.9    |
| Total                                                                     | 7.0       | 100.0   |

. table res\_ret\_carrier\_paed, statistic(frequency) statistic(percent) nformat(%2.1f)

|                                                                             | Frequency | Percent |
|-----------------------------------------------------------------------------|-----------|---------|
| I want to know if I am a carrier of a genetic change that can cause disease |           |         |
| Yes                                                                         | 5.0       | 71.4    |
| Not sure                                                                    | 2.0       | 28.6    |
| Total                                                                       | 7.0       | 100.0   |

. table res\_ret\_team\_decision\_paed, statistic(frequency) statistic(percent) nformat(%2.1f)

|                                                               | Frequency | Percent |
|---------------------------------------------------------------|-----------|---------|
| I'd like my medical team and the testing laboratory to decide |           |         |
| No                                                            | 2.0       | 28.6    |
| Yes                                                           | 2.0       | 28.6    |
| Not sure                                                      | 3.0       | 42.9    |
| Total                                                         | 7.0       | 100.0   |

. table res\_ret\_summary\_upload\_paed, statistic(frequency) statistic(percent) nformat(%2.1f)

|                                                                     | Frequency | Percent |
|---------------------------------------------------------------------|-----------|---------|
| I would like a summary of the main findings securely stored in CTRL |           |         |
| Yes                                                                 | 5.0       | 71.4    |
| Not sure                                                            | 2.0       | 28.6    |
| Total                                                               | 7.0       | 100.0   |



### c. Retrospective adult group

```
. table res_ret_r_actionable_adult, statistic(frequency) statistic(percent) nformat(%2.1f)
```

|                                                                       | Frequency | Percent |
|-----------------------------------------------------------------------|-----------|---------|
| I want to know about the genetic change if it is medically actionable |           |         |
| Yes                                                                   | 43.0      | 86.0    |
| Not sure                                                              | 7.0       | 14.0    |
| Total                                                                 | 50.0      | 100.0   |

```
. table res_ret_r_nonactionable_adult, statistic(frequency) statistic(percent) nformat(%2.1f)
```

|                                                                           | Frequency | Percent |
|---------------------------------------------------------------------------|-----------|---------|
| I want to know about the genetic change if it is non-medically actionable |           |         |
| No                                                                        | 1.0       | 2.0     |
| Yes                                                                       | 34.0      | 68.0    |
| Not sure                                                                  | 15.0      | 30.0    |
| Total                                                                     | 50.0      | 100.0   |

```
. table res_ret_r_carrier_adult, statistic(frequency) statistic(percent) nformat(%2.1f)
```

|                                                                             | Frequency | Percent |
|-----------------------------------------------------------------------------|-----------|---------|
| I want to know if I am a carrier of a genetic change that can cause disease |           |         |
| No                                                                          | 1.0       | 2.0     |
| Yes                                                                         | 43.0      | 86.0    |
| Not sure                                                                    | 6.0       | 12.0    |
| Total                                                                       | 50.0      | 100.0   |

```
. table res_ret_r_team_decision_adult, statistic(frequency) statistic(percent) nformat(%2.1f)
```

|                                                               | Frequency | Percent |
|---------------------------------------------------------------|-----------|---------|
| I'd like my medical team and the testing laboratory to decide |           |         |
| No                                                            | 13.0      | 26.0    |
| Yes                                                           | 23.0      | 46.0    |
| Not sure                                                      | 14.0      | 28.0    |
| Total                                                         | 50.0      | 100.0   |

```
. table res_ret_r_summary_upload_adult, statistic(frequency) statistic(percent) nformat(%2.1f)
```

|                                                                     | Frequency | Percent |
|---------------------------------------------------------------------|-----------|---------|
| I would like a summary of the main findings securely stored in CTRL |           |         |
| Yes                                                                 | 43.0      | 86.0    |
| Not sure                                                            | 7.0       | 14.0    |
| Total                                                               | 50.0      | 100.0   |

### d. Retrospective paediatric (parent/guardian) group

. table res\_ret\_r\_actionable\_paed, statistic(frequency) statistic(percent) nformat(%2.1f)

|                                                                       | Frequency | Percent |
|-----------------------------------------------------------------------|-----------|---------|
| I want to know about the genetic change if it is medically actionable |           |         |
| Yes                                                                   | 4.0       | 66.7    |
| Not sure                                                              | 2.0       | 33.3    |
| Total                                                                 | 6.0       | 100.0   |

. table res\_ret\_r\_nonactionable\_paed, statistic(frequency) statistic(percent) nformat(%2.1f)

|                                                                           | Frequency | Percent |
|---------------------------------------------------------------------------|-----------|---------|
| I want to know about the genetic change if it is non-medically actionable |           |         |
| Yes                                                                       | 4.0       | 66.7    |
| Not sure                                                                  | 2.0       | 33.3    |
| Total                                                                     | 6.0       | 100.0   |

. table res\_ret\_r\_carrier\_paed, statistic(frequency) statistic(percent) nformat(%2.1f)

|                                                                             | Frequency | Percent |
|-----------------------------------------------------------------------------|-----------|---------|
| I want to know if I am a carrier of a genetic change that can cause disease |           |         |
| Yes                                                                         | 4.0       | 66.7    |
| Not sure                                                                    | 2.0       | 33.3    |
| Total                                                                       | 6.0       | 100.0   |

. table res\_ret\_r\_team\_decision\_paed, statistic(frequency) statistic(percent) nformat(%2.1f)

|                                                               | Frequency | Percent |
|---------------------------------------------------------------|-----------|---------|
| I'd like my medical team and the testing laboratory to decide |           |         |
| No                                                            | 2.0       | 33.3    |
| Yes                                                           | 2.0       | 33.3    |
| Not sure                                                      | 2.0       | 33.3    |
| Total                                                         | 6.0       | 100.0   |

. table res\_ret\_r\_summary\_upload\_paed, statistic(frequency) statistic(percent) nformat(%2.1f)

|                                                                     | Frequency | Percent |
|---------------------------------------------------------------------|-----------|---------|
| I would like a summary of the main findings securely stored in CTRL |           |         |
| Yes                                                                 | 5.0       | 83.3    |
| Not sure                                                            | 1.0       | 16.7    |
| Total                                                               | 6.0       | 100.0   |

## e. Combined (prospective and retrospective)

```
. table res_ret_actionable, statistic(frequency) statistic(percent) nformat(%2.1f)
```

|                                                                       | Frequency | Percent |
|-----------------------------------------------------------------------|-----------|---------|
| I want to know about the genetic change if it is medically actionable |           |         |
| Yes                                                                   | 77.0      | 84.6    |
| Not sure                                                              | 14.0      | 15.4    |
| Total                                                                 | 91.0      | 100.0   |

```
. table res_ret_nonactionable, statistic(frequency) statistic(percent) nformat(%2.1f)
```

|                                                                           | Frequency | Percent |
|---------------------------------------------------------------------------|-----------|---------|
| I want to know about the genetic change if it is non-medically actionable |           |         |
| No                                                                        | 5.0       | 5.5     |
| Yes                                                                       | 62.0      | 68.1    |
| Not sure                                                                  | 24.0      | 26.4    |
| Total                                                                     | 91.0      | 100.0   |

```
. table res_ret_carrier, statistic(frequency) statistic(percent) nformat(%2.1f)
```

|                                                                             | Frequency | Percent |
|-----------------------------------------------------------------------------|-----------|---------|
| I want to know if I am a carrier of a genetic change that can cause disease |           |         |
| No                                                                          | 2.0       | 2.2     |
| Yes                                                                         | 77.0      | 84.6    |
| Not sure                                                                    | 12.0      | 13.2    |
| Total                                                                       | 91.0      | 100.0   |

```
. table res_ret_team_decision, statistic(frequency) statistic(percent) nformat(%2.1f)
```

|                                                               | Frequency | Percent |
|---------------------------------------------------------------|-----------|---------|
| I'd like my medical team and the testing laboratory to decide |           |         |
| No                                                            | 27.0      | 29.7    |
| Yes                                                           | 36.0      | 39.6    |
| Not sure                                                      | 28.0      | 30.8    |
| Total                                                         | 91.0      | 100.0   |

```
. table res_ret_summary_upload, statistic(frequency) statistic(percent) nformat(%2.1f)
```

|                                                                     | Frequency | Percent |
|---------------------------------------------------------------------|-----------|---------|
| I would like a summary of the main findings securely stored in CTRL |           |         |
| Yes                                                                 | 79.0      | 86.8    |
| Not sure                                                            | 12.0      | 13.2    |
| Total                                                               | 91.0      | 100.0   |

### 3. Preferences for future sample and data use

#### f. Prospective adult group

. table share\_nfp\_adult, statistic(frequency) statistic(percent) nformat(%2.1f)

|                                       | Frequency | Percent |
|---------------------------------------|-----------|---------|
| Not-for-profit research organisations |           |         |
| No                                    | 2.0       | 7.1     |
| Yes                                   | 23.0      | 82.1    |
| Not sure                              | 3.0       | 10.7    |
| Total                                 | 28.0      | 100.0   |

. table share\_uni\_adult, statistic(frequency) statistic(percent) nformat(%2.1f)

|                                      | Frequency | Percent |
|--------------------------------------|-----------|---------|
| Universities and research institutes |           |         |
| No                                   | 1.0       | 3.6     |
| Yes                                  | 24.0      | 85.7    |
| Not sure                             | 3.0       | 10.7    |
| Total                                | 28.0      | 100.0   |

. table share\_gov\_adult, statistic(frequency) statistic(percent) nformat(%2.1f)

|            | Frequency | Percent |
|------------|-----------|---------|
| Government |           |         |
| No         | 3.0       | 10.7    |
| Yes        | 20.0      | 71.4    |
| Not sure   | 5.0       | 17.9    |
| Total      | 28.0      | 100.0   |

. table share\_commercial\_adult, statistic(frequency) statistic(percent) nformat(%2.1f)

|                      | Frequency | Percent |
|----------------------|-----------|---------|
| Commercial companies |           |         |
| No                   | 10.0      | 35.7    |
| Yes                  | 12.0      | 42.9    |
| Not sure             | 6.0       | 21.4    |
| Total                | 28.0      | 100.0   |

. table share\_gen\_research\_adult, statistic(frequency) statistic(percent) nformat(%2.1f)

|                                        | Frequency | Percent |
|----------------------------------------|-----------|---------|
| General research use and clinical care |           |         |
| Yes                                    | 24.0      | 85.7    |
| Not sure                               | 4.0       | 14.3    |
| Total                                  | 28.0      | 100.0   |

. table share\_hmb\_adult, statistic(frequency) statistic(percent) nformat(%2.1f)

|                                    | Frequency | Percent |
|------------------------------------|-----------|---------|
| Health/medical/biomedical research |           |         |
| Yes                                | 24.0      | 85.7    |
| Not sure                           | 4.0       | 14.3    |
| Total                              | 28.0      | 100.0   |

. table share\_rel\_cond\_adult, statistic(frequency) statistic(percent) nformat(%2.1f)

|                                                       | Frequency | Percent |
|-------------------------------------------------------|-----------|---------|
| Research must be specifically related to my condition |           |         |
| No                                                    | 9.0       | 32.1    |
| Yes                                                   | 13.0      | 46.4    |
| Not sure                                              | 6.0       | 21.4    |
| Total                                                 | 28.0      | 100.0   |

`. table share_pop_anc_adult, statistic(frequency) statistic(percent) nformat(%2.1f)`

|                                  | Frequency | Percent |
|----------------------------------|-----------|---------|
| Population and ancestry research |           |         |
| No                               | 5.0       | 17.9    |
| Yes                              | 18.0      | 64.3    |
| Not sure                         | 5.0       | 17.9    |
| Total                            | 28.0      | 100.0   |

`. table share_gen_health_info_adult, statistic(frequency) statistic(percent) nformat(%2.1f)`

|                                                                                 | Frequency | Percent |
|---------------------------------------------------------------------------------|-----------|---------|
| Agree to my general health information being shared with other research studies |           |         |
| No                                                                              | 3.0       | 10.7    |
| Yes                                                                             | 17.0      | 60.7    |
| Not sure                                                                        | 8.0       | 28.6    |
| Total                                                                           | 28.0      | 100.0   |

`. table share_self_rep_info_adult, statistic(frequency) statistic(percent) nformat(%2.1f)`

|                                                                                | Frequency | Percent |
|--------------------------------------------------------------------------------|-----------|---------|
| Agree to my self-reported information being shared with other research studies |           |         |
| No                                                                             | 3.0       | 10.7    |
| Yes                                                                            | 16.0      | 57.1    |
| Not sure                                                                       | 9.0       | 32.1    |
| Total                                                                          | 28.0      | 100.0   |

`. table share_want_cont_adult, statistic(frequency) statistic(percent) nformat(%2.1f)`

|                                                            | Frequency | Percent |
|------------------------------------------------------------|-----------|---------|
| I want to be contacted every time my information is shared |           |         |
| No                                                         | 5.0       | 17.9    |
| Yes                                                        | 18.0      | 64.3    |
| Not sure                                                   | 5.0       | 17.9    |
| Total                                                      | 28.0      | 100.0   |

`. table share_cont_details_adult, statistic(frequency) statistic(percent) nformat(%2.1f)`

|                                                                                 | Frequency | Percent |
|---------------------------------------------------------------------------------|-----------|---------|
| I agree to Aus Genomics sharing my contact details with other research projects |           |         |
| No                                                                              | 5.0       | 17.9    |
| Yes                                                                             | 23.0      | 82.1    |
| Total                                                                           | 28.0      | 100.0   |

## g. Prospective paediatric (parent/guardian) group

`. table share_nfp_paed, statistic(frequency) statistic(percent) nformat(%2.1f)`

|                                       | Frequency | Percent |
|---------------------------------------|-----------|---------|
| Not-for-profit research organisations |           |         |
| No                                    | 1.0       | 14.3    |
| Yes                                   | 5.0       | 71.4    |
| Not sure                              | 1.0       | 14.3    |
| Total                                 | 7.0       | 100.0   |

`. table share_uni_paed, statistic(frequency) statistic(percent) nformat(%2.1f)`

|                                      | Frequency | Percent |
|--------------------------------------|-----------|---------|
| Universities and research institutes |           |         |
| No                                   | 1.0       | 14.3    |
| Yes                                  | 5.0       | 71.4    |
| Not sure                             | 1.0       | 14.3    |
| Total                                | 7.0       | 100.0   |

`. table share_gov_paed, statistic(frequency) statistic(percent) nformat(%2.1f)`

|            | Frequency | Percent |
|------------|-----------|---------|
| Government |           |         |
| No         | 1.0       | 14.3    |
| Yes        | 4.0       | 57.1    |
| Not sure   | 2.0       | 28.6    |
| Total      | 7.0       | 100.0   |

`. table share_commercial_paed, statistic(frequency) statistic(percent) nformat(%2.1f)`

|                      | Frequency | Percent |
|----------------------|-----------|---------|
| Commercial companies |           |         |
| No                   | 2.0       | 28.6    |
| Yes                  | 3.0       | 42.9    |
| Not sure             | 2.0       | 28.6    |
| Total                | 7.0       | 100.0   |

`. table share_gen_research_paed, statistic(frequency) statistic(percent) nformat(%2.1f)`

|                                        | Frequency | Percent |
|----------------------------------------|-----------|---------|
| General research use and clinical care |           |         |
| No                                     | 1.0       | 14.3    |
| Yes                                    | 4.0       | 57.1    |
| Not sure                               | 2.0       | 28.6    |
| Total                                  | 7.0       | 100.0   |

`. table share_hmb_paed, statistic(frequency) statistic(percent) nformat(%2.1f)`

|                                    | Frequency | Percent |
|------------------------------------|-----------|---------|
| Health/medical/biomedical research |           |         |
| No                                 | 1.0       | 14.3    |
| Yes                                | 5.0       | 71.4    |
| Not sure                           | 1.0       | 14.3    |
| Total                              | 7.0       | 100.0   |

`. table share_rel_cond_paed, statistic(frequency) statistic(percent) nformat(%2.1f)`

|                                                       | Frequency | Percent |
|-------------------------------------------------------|-----------|---------|
| Research must be specifically related to my condition |           |         |
| No                                                    | 1.0       | 14.3    |
| Yes                                                   | 4.0       | 57.1    |
| Not sure                                              | 2.0       | 28.6    |
| Total                                                 | 7.0       | 100.0   |

. table share\_pop\_anc\_paed, statistic(frequency) statistic(percent) nformat(%2.1f)

|                                  | Frequency | Percent |
|----------------------------------|-----------|---------|
| Population and ancestry research |           |         |
| No                               | 1.0       | 14.3    |
| Yes                              | 3.0       | 42.9    |
| Not sure                         | 3.0       | 42.9    |
| Total                            | 7.0       | 100.0   |

. table share\_gen\_health\_info\_paed, statistic(frequency) statistic(percent) nformat(%2.1f)

|                                                                                 | Frequency | Percent |
|---------------------------------------------------------------------------------|-----------|---------|
| Agree to my general health information being shared with other research studies |           |         |
| No                                                                              | 1.0       | 14.3    |
| Yes                                                                             | 4.0       | 57.1    |
| Not sure                                                                        | 2.0       | 28.6    |
| Total                                                                           | 7.0       | 100.0   |

. table share\_self\_rep\_info\_paed, statistic(frequency) statistic(percent) nformat(%2.1f)

|                                                                                | Frequency | Percent |
|--------------------------------------------------------------------------------|-----------|---------|
| Agree to my self-reported information being shared with other research studies |           |         |
| No                                                                             | 1.0       | 14.3    |
| Yes                                                                            | 4.0       | 57.1    |
| Not sure                                                                       | 2.0       | 28.6    |
| Total                                                                          | 7.0       | 100.0   |

. table share\_want\_cont\_paed, statistic(frequency) statistic(percent) nformat(%2.1f)

|                                                            | Frequency | Percent |
|------------------------------------------------------------|-----------|---------|
| I want to be contacted every time my information is shared |           |         |
| Yes                                                        | 6.0       | 85.7    |
| Not sure                                                   | 1.0       | 14.3    |
| Total                                                      | 7.0       | 100.0   |

. table share\_cont\_details\_paed, statistic(frequency) statistic(percent) nformat(%2.1f)

|                                                                                 | Frequency | Percent |
|---------------------------------------------------------------------------------|-----------|---------|
| I agree to Aus Genomics sharing my contact details with other research projects |           |         |
| Yes                                                                             | 7.0       | 100.0   |
| Total                                                                           | 7.0       | 100.0   |

## h. Retrospective adult group

. table share\_r\_nfp\_adult, statistic(frequency) statistic(percent) nformat(%2.1f)

|                                       | Frequency | Percent |
|---------------------------------------|-----------|---------|
| Not-for-profit research organisations |           |         |
| No                                    | 1.0       | 2.0     |
| Yes                                   | 40.0      | 80.0    |
| Not sure                              | 9.0       | 18.0    |
| Total                                 | 50.0      | 100.0   |

. table share\_r\_uni\_adult, statistic(frequency) statistic(percent) nformat(%2.1f)

|                                      | Frequency | Percent |
|--------------------------------------|-----------|---------|
| Universities and research institutes |           |         |
| Yes                                  | 41.0      | 82.0    |
| Not sure                             | 9.0       | 18.0    |
| Total                                | 50.0      | 100.0   |

. table share\_r\_gov\_adult, statistic(frequency) statistic(percent) nformat(%2.1f)

|            | Frequency | Percent |
|------------|-----------|---------|
| Government |           |         |
| No         | 2.0       | 4.0     |
| Yes        | 36.0      | 72.0    |
| Not sure   | 12.0      | 24.0    |
| Total      | 50.0      | 100.0   |

. table share\_r\_commercial\_adult, statistic(frequency) statistic(percent) nformat(%2.1f)

|                      | Frequency | Percent |
|----------------------|-----------|---------|
| Commercial companies |           |         |
| No                   | 7.0       | 14.0    |
| Yes                  | 24.0      | 48.0    |
| Not sure             | 19.0      | 38.0    |
| Total                | 50.0      | 100.0   |

. table share\_r\_gen\_research\_adult, statistic(frequency) statistic(percent) nformat(%2.1f)

|                                        | Frequency | Percent |
|----------------------------------------|-----------|---------|
| General research use and clinical care |           |         |
| Yes                                    | 40.0      | 80.0    |
| Not sure                               | 10.0      | 20.0    |
| Total                                  | 50.0      | 100.0   |

. table share\_r\_hmb\_adult, statistic(frequency) statistic(percent) nformat(%2.1f)

|                                    | Frequency | Percent |
|------------------------------------|-----------|---------|
| Health/medical/biomedical research |           |         |
| Yes                                | 41.0      | 82.0    |
| Not sure                           | 9.0       | 18.0    |
| Total                              | 50.0      | 100.0   |

. table share\_r\_rel\_cond\_adult, statistic(frequency) statistic(percent) nformat(%2.1f)

|                                                       | Frequency | Percent |
|-------------------------------------------------------|-----------|---------|
| Research must be specifically related to my condition |           |         |
| No                                                    | 15.0      | 30.0    |
| Yes                                                   | 20.0      | 40.0    |
| Not sure                                              | 15.0      | 30.0    |
| Total                                                 | 50.0      | 100.0   |



. table share\_r\_pop\_anc\_adult, statistic(frequency) statistic(percent) nformat(%2.1f)

|                                  | Frequency | Percent |
|----------------------------------|-----------|---------|
| Population and ancestry research |           |         |
| No                               | 3.0       | 6.0     |
| Yes                              | 36.0      | 72.0    |
| Not sure                         | 11.0      | 22.0    |
| Total                            | 50.0      | 100.0   |

. table share\_r\_gen\_health\_info\_adult, statistic(frequency) statistic(percent) nformat(%2.1f)

|                                                                                 | Frequency | Percent |
|---------------------------------------------------------------------------------|-----------|---------|
| Agree to my general health information being shared with other research studies |           |         |
| No                                                                              | 6.0       | 12.0    |
| Yes                                                                             | 30.0      | 60.0    |
| Not sure                                                                        | 14.0      | 28.0    |
| Total                                                                           | 50.0      | 100.0   |

. table share\_r\_self\_rep\_info\_adult, statistic(frequency) statistic(percent) nformat(%2.1f)

|                                                                                | Frequency | Percent |
|--------------------------------------------------------------------------------|-----------|---------|
| Agree to my self-reported information being shared with other research studies |           |         |
| No                                                                             | 6.0       | 12.0    |
| Yes                                                                            | 30.0      | 60.0    |
| Not sure                                                                       | 14.0      | 28.0    |
| Total                                                                          | 50.0      | 100.0   |

. table share\_r\_want\_cont\_adult, statistic(frequency) statistic(percent) nformat(%2.1f)

|                                                            | Frequency | Percent |
|------------------------------------------------------------|-----------|---------|
| I want to be contacted every time my information is shared |           |         |
| No                                                         | 8.0       | 16.0    |
| Yes                                                        | 30.0      | 60.0    |
| Not sure                                                   | 12.0      | 24.0    |
| Total                                                      | 50.0      | 100.0   |

. table share\_r\_cont\_details\_adult, statistic(frequency) statistic(percent) nformat(%2.1f)

|                                                                                 | Frequency | Percent |
|---------------------------------------------------------------------------------|-----------|---------|
| I agree to Aus Genomics sharing my contact details with other research projects |           |         |
| No                                                                              | 13.0      | 26.0    |
| Yes                                                                             | 37.0      | 74.0    |
| Total                                                                           | 50.0      | 100.0   |

## i. Retrospective paediatric (parent/guardian) group

. table share\_r\_nfp\_paed, statistic(frequency) statistic(percent) nformat(%2.1f)

|                                       | Frequency | Percent |
|---------------------------------------|-----------|---------|
| Not-for-profit research organisations |           |         |
| Yes                                   | 5.0       | 83.3    |
| Not sure                              | 1.0       | 16.7    |
| Total                                 | 6.0       | 100.0   |

. table share\_r\_uni\_paed, statistic(frequency) statistic(percent) nformat(%2.1f)

|                                      | Frequency | Percent |
|--------------------------------------|-----------|---------|
| Universities and research institutes |           |         |
| Yes                                  | 5.0       | 83.3    |
| Not sure                             | 1.0       | 16.7    |
| Total                                | 6.0       | 100.0   |

. table share\_r\_gov\_paed, statistic(frequency) statistic(percent) nformat(%2.1f)

|            | Frequency | Percent |
|------------|-----------|---------|
| Government |           |         |
| Yes        | 4.0       | 66.7    |
| Not sure   | 2.0       | 33.3    |
| Total      | 6.0       | 100.0   |

. table share\_r\_commercial\_paed, statistic(frequency) statistic(percent) nformat(%2.1f)

|                      | Frequency | Percent |
|----------------------|-----------|---------|
| Commercial companies |           |         |
| No                   | 1.0       | 16.7    |
| Yes                  | 2.0       | 33.3    |
| Not sure             | 3.0       | 50.0    |
| Total                | 6.0       | 100.0   |

. table share\_r\_gen\_research\_paed, statistic(frequency) statistic(percent) nformat(%2.1f)

|                                        | Frequency | Percent |
|----------------------------------------|-----------|---------|
| General research use and clinical care |           |         |
| Yes                                    | 5.0       | 83.3    |
| Not sure                               | 1.0       | 16.7    |
| Total                                  | 6.0       | 100.0   |

. table share\_r\_hmb\_paed, statistic(frequency) statistic(percent) nformat(%2.1f)

|                                    | Frequency | Percent |
|------------------------------------|-----------|---------|
| Health/medical/biomedical research |           |         |
| Yes                                | 5.0       | 83.3    |
| Not sure                           | 1.0       | 16.7    |
| Total                              | 6.0       | 100.0   |

. table share\_r\_rel\_cond\_paed, statistic(frequency) statistic(percent) nformat(%2.1f)

|                                                       | Frequency | Percent |
|-------------------------------------------------------|-----------|---------|
| Research must be specifically related to my condition |           |         |
| No                                                    | 1.0       | 16.7    |
| Yes                                                   | 3.0       | 50.0    |
| Not sure                                              | 2.0       | 33.3    |
| Total                                                 | 6.0       | 100.0   |

. table share\_r\_pop\_anc\_paed, statistic(frequency) statistic(percent) nformat(%2.1f)

|                                  | Frequency | Percent |
|----------------------------------|-----------|---------|
| Population and ancestry research |           |         |
| Yes                              | 5.0       | 83.3    |
| Not sure                         | 1.0       | 16.7    |
| Total                            | 6.0       | 100.0   |

. table share\_r\_gen\_health\_info\_paed, statistic(frequency) statistic(percent) nformat(%2.1f)

|                                                                                 | Frequency | Percent |
|---------------------------------------------------------------------------------|-----------|---------|
| Agree to my general health information being shared with other research studies |           |         |
| Yes                                                                             | 3.0       | 50.0    |
| Not sure                                                                        | 3.0       | 50.0    |
| Total                                                                           | 6.0       | 100.0   |

. table share\_r\_self\_rep\_info\_paed, statistic(frequency) statistic(percent) nformat(%2.1f)

|                                                                                | Frequency | Percent |
|--------------------------------------------------------------------------------|-----------|---------|
| Agree to my self-reported information being shared with other research studies |           |         |
| Yes                                                                            | 3.0       | 50.0    |
| Not sure                                                                       | 3.0       | 50.0    |
| Total                                                                          | 6.0       | 100.0   |

. table share\_r\_want\_cont\_paed, statistic(frequency) statistic(percent) nformat(%2.1f)

|                                                            | Frequency | Percent |
|------------------------------------------------------------|-----------|---------|
| I want to be contacted every time my information is shared |           |         |
| Yes                                                        | 4.0       | 66.7    |
| Not sure                                                   | 2.0       | 33.3    |
| Total                                                      | 6.0       | 100.0   |

. table share\_r\_cont\_details\_paed, statistic(frequency) statistic(percent) nformat(%2.1f)

|                                                                                 | Frequency | Percent |
|---------------------------------------------------------------------------------|-----------|---------|
| I agree to Aus Genomics sharing my contact details with other research projects |           |         |
| No                                                                              | 1.0       | 16.7    |
| Yes                                                                             | 5.0       | 83.3    |
| Total                                                                           | 6.0       | 100.0   |

## j. Combined (prospective and retrospective)

. table share\_nfp, statistic(frequency) statistic(percent) nformat(%2.1f)

|                                       | Frequency | Percent |
|---------------------------------------|-----------|---------|
| Not-for-profit research organisations |           |         |
| No                                    | 4.0       | 4.4     |
| Yes                                   | 73.0      | 80.2    |
| Not sure                              | 14.0      | 15.4    |
| Total                                 | 91.0      | 100.0   |

. table share\_uni, statistic(frequency) statistic(percent) nformat(%2.1f)

|                                      | Frequency | Percent |
|--------------------------------------|-----------|---------|
| Universities and research institutes |           |         |
| No                                   | 2.0       | 2.2     |
| Yes                                  | 75.0      | 82.4    |
| Not sure                             | 14.0      | 15.4    |
| Total                                | 91.0      | 100.0   |

. table share\_gov, statistic(frequency) statistic(percent) nformat(%2.1f)

|            | Frequency | Percent |
|------------|-----------|---------|
| Government |           |         |
| No         | 6.0       | 6.6     |
| Yes        | 64.0      | 70.3    |
| Not sure   | 21.0      | 23.1    |
| Total      | 91.0      | 100.0   |

. table share\_commercial, statistic(frequency) statistic(percent) nformat(%2.1f)

|                      | Frequency | Percent |
|----------------------|-----------|---------|
| Commercial companies |           |         |
| No                   | 20.0      | 22.0    |
| Yes                  | 41.0      | 45.1    |
| Not sure             | 30.0      | 33.0    |
| Total                | 91.0      | 100.0   |

. table share\_gen\_research, statistic(frequency) statistic(percent) nformat(%2.1f)

|                                        | Frequency | Percent |
|----------------------------------------|-----------|---------|
| General research use and clinical care |           |         |
| No                                     | 1.0       | 1.1     |
| Yes                                    | 73.0      | 80.2    |
| Not sure                               | 17.0      | 18.7    |
| Total                                  | 91.0      | 100.0   |

. table share\_hmb, statistic(frequency) statistic(percent) nformat(%2.1f)

|                                    | Frequency | Percent |
|------------------------------------|-----------|---------|
| Health/medical/biomedical research |           |         |
| No                                 | 1.0       | 1.1     |
| Yes                                | 75.0      | 82.4    |
| Not sure                           | 15.0      | 16.5    |
| Total                              | 91.0      | 100.0   |

. table share\_rel\_cond, statistic(frequency) statistic(percent) nformat(%2.1f)

|                                                       | Frequency | Percent |
|-------------------------------------------------------|-----------|---------|
| Research must be specifically related to my condition |           |         |
| No                                                    | 26.0      | 28.6    |
| Yes                                                   | 40.0      | 44.0    |
| Not sure                                              | 25.0      | 27.5    |
| Total                                                 | 91.0      | 100.0   |

. table share\_pop\_anc, statistic(frequency) statistic(percent) nformat(%2.1f)

|                                  | Frequency | Percent |
|----------------------------------|-----------|---------|
| Population and ancestry research |           |         |
| No                               | 9.0       | 9.9     |
| Yes                              | 62.0      | 68.1    |
| Not sure                         | 20.0      | 22.0    |
| Total                            | 91.0      | 100.0   |

. table share\_gen\_health\_info, statistic(frequency) statistic(percent) nformat(%2.1f)

|                                                                                 | Frequency | Percent |
|---------------------------------------------------------------------------------|-----------|---------|
| Agree to my general health information being shared with other research studies |           |         |
| No                                                                              | 10.0      | 11.0    |
| Yes                                                                             | 54.0      | 59.3    |
| Not sure                                                                        | 27.0      | 29.7    |
| Total                                                                           | 91.0      | 100.0   |

. table share\_self\_rep\_info, statistic(frequency) statistic(percent) nformat(%2.1f)

|                                                                                | Frequency | Percent |
|--------------------------------------------------------------------------------|-----------|---------|
| Agree to my self-reported information being shared with other research studies |           |         |
| No                                                                             | 10.0      | 11.0    |
| Yes                                                                            | 53.0      | 58.2    |
| Not sure                                                                       | 28.0      | 30.8    |
| Total                                                                          | 91.0      | 100.0   |

. table share\_want\_cont, statistic(frequency) statistic(percent) nformat(%2.1f)

|                                                            | Frequency | Percent |
|------------------------------------------------------------|-----------|---------|
| I want to be contacted every time my information is shared |           |         |
| No                                                         | 13.0      | 14.3    |
| Yes                                                        | 58.0      | 63.7    |
| Not sure                                                   | 20.0      | 22.0    |
| Total                                                      | 91.0      | 100.0   |

. table share\_cont\_details, statistic(frequency) statistic(percent) nformat(%2.1f)

|                                                                                 | Frequency | Percent |
|---------------------------------------------------------------------------------|-----------|---------|
| I agree to Aus Genomics sharing my contact details with other research projects |           |         |
| No                                                                              | 19.0      | 20.9    |
| Yes                                                                             | 72.0      | 79.1    |
| Total                                                                           | 91.0      | 100.0   |

#### 4. Comparison of preferences between the prospective and the retrospective cohorts

. tabulate res\_ret\_actionable cohort, chi2

| I want to know about the genetic change if it is medically actionable | Cohort    |           | Total |
|-----------------------------------------------------------------------|-----------|-----------|-------|
|                                                                       | Prospecti | Retrospec |       |
| Yes                                                                   | 30        | 47        | 77    |
| Not sure                                                              | 5         | 9         | 14    |
| Total                                                                 | 35        | 56        | 91    |

Pearson chi2(1) = 0.0528 Pr = 0.818

. tabulate res\_ret\_nonactionable cohort, chi2

| I want to know about the genetic change if it is non-medically actionable | Cohort    |           | Total |
|---------------------------------------------------------------------------|-----------|-----------|-------|
|                                                                           | Prospecti | Retrospec |       |
| No                                                                        | 4         | 1         | 5     |
| Yes                                                                       | 24        | 38        | 62    |
| Not sure                                                                  | 7         | 17        | 24    |
| Total                                                                     | 35        | 56        | 91    |

Pearson chi2(2) = 4.5227 Pr = 0.104

. tabulate res\_ret\_carrier cohort, chi2

| I want to know if I am a carrier of a genetic change that can cause disease | Cohort    |           | Total |
|-----------------------------------------------------------------------------|-----------|-----------|-------|
|                                                                             | Prospecti | Retrospec |       |
| No                                                                          | 1         | 1         | 2     |
| Yes                                                                         | 30        | 47        | 77    |
| Not sure                                                                    | 4         | 8         | 12    |
| Total                                                                       | 35        | 56        | 91    |

Pearson chi2(2) = 0.2540 Pr = 0.881

```
. tabulate res_ret_team_decision cohort, chi2
```

| I'd like<br>my medical<br>team and<br>the<br>testing<br>laboratory<br>to decide | Cohort    |           | Total |
|---------------------------------------------------------------------------------|-----------|-----------|-------|
|                                                                                 | Prospecti | Retrospec |       |
| No                                                                              | 12        | 15        | 27    |
| Yes                                                                             | 11        | 25        | 36    |
| Not sure                                                                        | 12        | 16        | 28    |
| Total                                                                           | 35        | 56        | 91    |

Pearson chi2(2) = 1.5876 Pr = 0.452

```
. tabulate res_ret_summary_upload cohort, chi2
```

| I would<br>like a<br>summary of<br>the main<br>findings<br>securely<br>stored in<br>CTRL | Cohort    |           | Total |
|------------------------------------------------------------------------------------------|-----------|-----------|-------|
|                                                                                          | Prospecti | Retrospec |       |
| Yes                                                                                      | 31        | 48        | 79    |
| Not sure                                                                                 | 4         | 8         | 12    |
| Total                                                                                    | 35        | 56        | 91    |

Pearson chi2(1) = 0.1536 Pr = 0.695

. tabulate share\_nfp cohort, chi2

| Not-for-profit<br>research<br>organisations | Cohort    |           | Total |
|---------------------------------------------|-----------|-----------|-------|
|                                             | Prospecti | Retrospec |       |
| No                                          | 3         | 1         | 4     |
| Yes                                         | 28        | 45        | 73    |
| Not sure                                    | 4         | 10        | 14    |
| Total                                       | 35        | 56        | 91    |

Pearson chi2(2) = 2.8352 Pr = 0.242

. tabulate share\_uni cohort, chi2

| Universities and<br>research<br>institutes | Cohort    |           | Total |
|--------------------------------------------|-----------|-----------|-------|
|                                            | Prospecti | Retrospec |       |
| No                                         | 2         | 0         | 2     |
| Yes                                        | 29        | 46        | 75    |
| Not sure                                   | 4         | 10        | 14    |
| Total                                      | 35        | 56        | 91    |

Pearson chi2(2) = 3.7799 Pr = 0.151

. tabulate share\_gov cohort, chi2

| Government | Cohort    |           | Total |
|------------|-----------|-----------|-------|
|            | Prospecti | Retrospec |       |
| No         | 4         | 2         | 6     |
| Yes        | 24        | 40        | 64    |
| Not sure   | 7         | 14        | 21    |
| Total      | 35        | 56        | 91    |

Pearson chi2(2) = 2.2750 Pr = 0.321

. tabulate share\_commercial cohort, chi2

| Commercial<br>companies | Cohort    |           | Total |
|-------------------------|-----------|-----------|-------|
|                         | Prospecti | Retrospec |       |
| No                      | 12        | 8         | 20    |
| Yes                     | 15        | 26        | 41    |
| Not sure                | 8         | 22        | 30    |
| Total                   | 35        | 56        | 91    |

Pearson chi2(2) = 5.7443 Pr = 0.057



. tabulate share\_gen\_research cohort, chi2

| General<br>research<br>use and<br>clinical<br>care | Cohort    |           | Total |
|----------------------------------------------------|-----------|-----------|-------|
|                                                    | Prospecti | Retrospec |       |
| No                                                 | 1         | 0         | 1     |
| Yes                                                | 28        | 45        | 73    |
| Not sure                                           | 6         | 11        | 17    |
| Total                                              | 35        | 56        | 91    |

Pearson chi2(2) = 1.6724 Pr = 0.433

. tabulate share\_hmb cohort, chi2

| Health/med<br>ical/biome<br>dical<br>research | Cohort    |           | Total |
|-----------------------------------------------|-----------|-----------|-------|
|                                               | Prospecti | Retrospec |       |
| No                                            | 1         | 0         | 1     |
| Yes                                           | 29        | 46        | 75    |
| Not sure                                      | 5         | 10        | 15    |
| Total                                         | 35        | 56        | 91    |

Pearson chi2(2) = 1.7680 Pr = 0.413

. tabulate share\_rel\_cond cohort, chi2

| Research<br>must be<br>specific<br>ly related<br>to my<br>condition | Cohort    |           | Total |
|---------------------------------------------------------------------|-----------|-----------|-------|
|                                                                     | Prospecti | Retrospec |       |
| No                                                                  | 10        | 16        | 26    |
| Yes                                                                 | 17        | 23        | 40    |
| Not sure                                                            | 8         | 17        | 25    |
| Total                                                               | 35        | 56        | 91    |

Pearson chi2(2) = 0.7166 Pr = 0.699

. tabulate share\_pop\_anc cohort, chi2

| Population and ancestry research | Cohort    |           | Total |
|----------------------------------|-----------|-----------|-------|
|                                  | Prospecti | Retrospec |       |
| No                               | 6         | 3         | 9     |
| Yes                              | 21        | 41        | 62    |
| Not sure                         | 8         | 12        | 20    |
| Total                            | 35        | 56        | 91    |

Pearson chi2(2) = 3.5970 Pr = 0.166

. tabulate share\_gen\_health\_info cohort, chi2

| Agree to my general health information being shared with other studies | Cohort    |           | Total |
|------------------------------------------------------------------------|-----------|-----------|-------|
|                                                                        | Prospecti | Retrospec |       |
| No                                                                     | 4         | 6         | 10    |
| Yes                                                                    | 21        | 33        | 54    |
| Not sure                                                               | 10        | 17        | 27    |
| Total                                                                  | 35        | 56        | 91    |

Pearson chi2(2) = 0.0373 Pr = 0.982

. tabulate share\_self\_rep\_info cohort, chi2

| Agree to my self-reported information being shared with other studies | Cohort    |           | Total |
|-----------------------------------------------------------------------|-----------|-----------|-------|
|                                                                       | Prospecti | Retrospec |       |
| No                                                                    | 4         | 6         | 10    |
| Yes                                                                   | 20        | 33        | 53    |
| Not sure                                                              | 11        | 17        | 28    |
| Total                                                                 | 35        | 56        | 91    |

Pearson chi2(2) = 0.0298 Pr = 0.985

```
. tabulate share_want_cont cohort, chi2
```

| I want to<br>be<br>contacted<br>every time<br>my<br>informatio<br>n is<br>shared | Cohort    |           | Total |
|----------------------------------------------------------------------------------|-----------|-----------|-------|
|                                                                                  | Prospecti | Retrospec |       |
| No                                                                               | 5         | 8         | 13    |
| Yes                                                                              | 24        | 34        | 58    |
| Not sure                                                                         | 6         | 14        | 20    |
| Total                                                                            | 35        | 56        | 91    |

Pearson chi2(2) = 0.8136 Pr = 0.666

```
. tabulate share_cont_details cohort, chi2
```

| I agree to<br>Aus<br>Genomics<br>sharing my<br>contact<br>details<br>with other<br>projects | Cohort    |           | Total |
|---------------------------------------------------------------------------------------------|-----------|-----------|-------|
|                                                                                             | Prospecti | Retrospec |       |
| No                                                                                          | 5         | 14        | 19    |
| Yes                                                                                         | 30        | 42        | 72    |
| Total                                                                                       | 35        | 56        | 91    |

Pearson chi2(1) = 1.4967 Pr = 0.221

## 5. Self-reported experience evaluation measures

### 5.1. Satisfaction

#### a. CTRL group

| Variable     | Obs | Mean     | Std. Dev. | Min | Max |
|--------------|-----|----------|-----------|-----|-----|
| satisfacti~l | 39  | 9.025641 | 1.662072  | 3   | 10  |
| satisfact~1m | 36  | 8.833333 | 1.764734  | 2   | 10  |
| satisfact~6m | 20  | 8.6      | 1.698296  | 5   | 10  |
| satisfac~12m | 20  | 8.6      | 1.667018  | 5   | 10  |

#### b. Non-CTRL group

| Variable     | Obs | Mean     | Std. Dev. | Min | Max |
|--------------|-----|----------|-----------|-----|-----|
| satisfacti~l | 161 | 8.223602 | 1.857334  | 2   | 10  |
| satisfact~1m | 123 | 8.658537 | 1.928345  | 0   | 10  |
| satisfact~6m | 68  | 8.147059 | 2.060754  | 1   | 10  |
| satisfac~12m | 44  | 8.340909 | 2.177509  | 1   | 10  |

### 5.2. Decision regret

#### a. CTRL group

##### BASELINE

| Variable     | Obs | Mean   | Std. Dev. | Min | Max |
|--------------|-----|--------|-----------|-----|-----|
| decision_c~l | 40  | 27.075 | 3.116437  | 20  | 30  |

##### 1-MONTH AFTER RETURN OF RESULT

| Variable     | Obs | Mean     | Std. Dev. | Min | Max |
|--------------|-----|----------|-----------|-----|-----|
| decision_~1m | 34  | 24.58824 | 7.148289  | 6   | 30  |

##### 6-MONTH AFTER RETURN OF RESULT

| Variable     | Obs | Mean     | Std. Dev. | Min | Max |
|--------------|-----|----------|-----------|-----|-----|
| decision_~6m | 19  | 23.68421 | 6.758144  | 6   | 30  |

##### 12-MONTH AFTER RETURN OF RESULT

| Variable     | Obs | Mean     | Std. Dev. | Min | Max |
|--------------|-----|----------|-----------|-----|-----|
| decision_~2m | 19  | 25.57895 | 5.409003  | 10  | 30  |

#### 24-MONTH AFTER RETURN OF RESULT

| Variable     | Obs | Mean    | Std. Dev. | Min | Max |
|--------------|-----|---------|-----------|-----|-----|
| decision_~4m | 16  | 28.4375 | 2.337199  | 24  | 30  |

### b. Non-CTRL group

#### BASELINE

| Variable     | Obs | Mean     | Std. Dev. | Min | Max |
|--------------|-----|----------|-----------|-----|-----|
| decision_n~l | 159 | 26.59119 | 2.987768  | 8   | 30  |

#### 1-MONTH AFTER RETURN OF RESULT

| Variable     | Obs | Mean     | Std. Dev. | Min | Max |
|--------------|-----|----------|-----------|-----|-----|
| decision_~1m | 119 | 24.54622 | 6.469941  | 6   | 30  |

#### 6-MONTH AFTER RETURN OF RESULT

| Variable     | Obs | Mean     | Std. Dev. | Min | Max |
|--------------|-----|----------|-----------|-----|-----|
| decision_~6m | 67  | 24.71642 | 6.229952  | 6   | 30  |

#### 12-MONTH AFTER RETURN OF RESULT

| Variable     | Obs | Mean     | Std. Dev. | Min | Max |
|--------------|-----|----------|-----------|-----|-----|
| decision_~2m | 44  | 22.34091 | 7.673401  | 6   | 30  |

#### 24-MONTHS AFTER RETURN OF RESULT

| Variable     | Obs | Mean     | Std. Dev. | Min | Max |
|--------------|-----|----------|-----------|-----|-----|
| decision_~4m | 29  | 26.58621 | 3.746591  | 18  | 30  |

### 5.3. Trust in research(ers)

#### a. CTRL group

##### BASELINE

| Variable     | Obs | Mean     | Std. Dev. | Min | Max |
|--------------|-----|----------|-----------|-----|-----|
| trust_ctrl~l | 39  | 15.23077 | 3.064753  | 4   | 20  |

##### 1-MONTH AFTER RETURN OF RESULT

| Variable     | Obs | Mean     | Std. Dev. | Min | Max |
|--------------|-----|----------|-----------|-----|-----|
| trust_ctr~1m | 36  | 16.30556 | 2.493643  | 12  | 20  |

##### 6-MONTH AFTER RETURN OF RESULT

| Variable     | Obs | Mean     | Std. Dev. | Min | Max |
|--------------|-----|----------|-----------|-----|-----|
| trust_ctr~6m | 19  | 15.73684 | 2.445906  | 12  | 20  |

##### 12-MONTH AFTER RETURN OF RESULT

| Variable     | Obs | Mean  | Std. Dev. | Min | Max |
|--------------|-----|-------|-----------|-----|-----|
| trust_ct~12m | 20  | 15.05 | 2.459675  | 10  | 20  |

#### b. Non-CTRL group

##### BASELINE

| Variable     | Obs | Mean     | Std. Dev. | Min | Max |
|--------------|-----|----------|-----------|-----|-----|
| trust_nonc~l | 158 | 15.92405 | 3.181444  | 4   | 20  |

##### 1-MONTH AFTER RETURN OF RESULT

| Variable     | Obs | Mean     | Std. Dev. | Min | Max |
|--------------|-----|----------|-----------|-----|-----|
| trust_non~1m | 121 | 16.38017 | 2.646558  | 11  | 20  |

##### 6-MONTH AFTER RETURN OF RESULT

| Variable     | Obs | Mean     | Std. Dev. | Min | Max |
|--------------|-----|----------|-----------|-----|-----|
| trust_non~6m | 68  | 15.82353 | 2.59702   | 8   | 20  |

##### 12-MONTH AFTER RETURN OF RESULT

| Variable     | Obs | Mean     | Std. Dev. | Min | Max |
|--------------|-----|----------|-----------|-----|-----|
| trust_no~12m | 44  | 15.84091 | 2.458428  | 11  | 20  |

## 5.4. Understanding of genomic testing

### a. CTRL group

| Variable                     | N  | Mean | SD | Min | Max |
|------------------------------|----|------|----|-----|-----|
| knowledge_sum_ctrl_adult_bl  | 63 | 8    | 1  | 5   | 10  |
| knowledge_sum_ctrl_adult_1m  | 45 | 8    | 2  | 4   | 10  |
| knowledge_sum_ctrl_adult_6m  | 36 | 8    | 1  | 4   | 10  |
| knowledge_sum_ctrl_adult_12m | 33 | 8    | 1  | 6   | 10  |
| knowledge_sum_ctrl_adult_24m | 17 | 9    | 1  | 7   | 10  |

### b. Non-CTRL group

| Variable                        | N   | Mean | SD | Min | Max |
|---------------------------------|-----|------|----|-----|-----|
| knowledge_sum_nonCTRL_adult_bl  | 256 | 8    | 2  | 0   | 10  |
| knowledge_sum_nonCTRL_adult_1m  | 152 | 8    | 2  | 2   | 10  |
| knowledge_sum_nonCTRL_adult_6m  | 121 | 8    | 2  | 0   | 10  |
| knowledge_sum_nonCTRL_adult_12m | 75  | 8    | 2  | 3   | 10  |
| knowledge_sum_nonCTRL_adult_24m | 28  | 7    | 2  | 0   | 10  |

## Self-reported experience evaluation measures

### A. Satisfaction

Thinking about your involvement in the study so far, overall...

I had a very  
poor  
experience

I had a very  
good  
experience

0    1    2    3    4    5    6    7    8    9    10

|  |  |  |  |  |  |  |  |  |  |  |
|--|--|--|--|--|--|--|--|--|--|--|
|  |  |  |  |  |  |  |  |  |  |  |
|--|--|--|--|--|--|--|--|--|--|--|

Graham C, MacCormick S. Overarching Questions for Patient Surveys: Development Report for the Care Quality Commission (CQC). Picker Institute Europe. 2012

### B. My decision

Please think about the decision you made to participate in the study after talking to the clinician/genetic counsellor.

|                                                             | Strongly Agree | Agree | Neither Agree Nor Disagree | Disagree | Strongly Disagree |
|-------------------------------------------------------------|----------------|-------|----------------------------|----------|-------------------|
| It was the right decision                                   |                |       |                            |          |                   |
| I regret the choice that was made                           |                |       |                            |          |                   |
| I would go for the same choice if I had to do it over again |                |       |                            |          |                   |
| The choice did me a lot of harm                             |                |       |                            |          |                   |
| The decision was a wise one                                 |                |       |                            |          |                   |
| I know I can easily change my mind                          |                |       |                            |          |                   |

Brehaut JC, O'Connor AM, Wood TJ, et al. Validation of a decision regret scale. *Med Decis Making*. 2003;23(4):281-292. doi:10.1177/0272989X03256005

### C. Trust

|                                                                                    | Strongly Agree | Agree | Neither Agree Nor Disagree | Disagree | Strongly Disagree |
|------------------------------------------------------------------------------------|----------------|-------|----------------------------|----------|-------------------|
| Doctors who do medical research care only about what is best for each participant. |                |       |                            |          |                   |



|                                                                                         |  |  |  |  |  |
|-----------------------------------------------------------------------------------------|--|--|--|--|--|
| Doctors tell participants everything they need to know about being in a research study. |  |  |  |  |  |
| Medical researchers treat people like "guinea pigs."                                    |  |  |  |  |  |
| I completely trust doctors who do medical research.                                     |  |  |  |  |  |

Hall MA, Camacho F, Lawlor JS, Depuy V, Sugarman J, Weinfurt K. Measuring trust in medical researchers. Med Care. 2006;44(11):1048-1053. doi:10.1097/01.mlr.0000228023.37087.cb

#### D. Your Understanding of Genomic Testing

The following statements relate to your understanding of the genomic sequencing test. Your responses will help us improve the information we provide about genomic sequencing in the future.

|                                                                                                                 | True | False | Unsure |
|-----------------------------------------------------------------------------------------------------------------|------|-------|--------|
| 1. The test may identify a gene variant that causes the condition                                               |      |       |        |
| 2. The test may not identify any gene variants that the doctors think could cause the condition.                |      |       |        |
| 3. The test may identify gene variants that might be the cause of the condition, but the doctors are uncertain. |      |       |        |
| 4. The test may reveal gene variants that can cause other unrelated conditions that may develop in the future.  |      |       |        |
| 5. The test may find gene variants that could be passed on in the family.                                       |      |       |        |
| 6. The data from the test cannot be stored and looked at in the future - a new test is required each time.      |      |       |        |
| 7. Anonymised data from the test can be used for the purpose of advancing knowledge (research).                 |      |       |        |
| 8. The test will rule out a genetic condition in me.                                                            |      |       |        |
| 9. The main reason for the test is to help my family.                                                           |      |       |        |
| 10. If the test is negative, my children are not at increased risk.                                             |      |       |        |
